# Supplementary material for: Sequencing-based Spatial Transcriptomics with scRNA-seq Sensitivity
Source: Research Square preprint supplement (doi:10.21203/rs.3.rs-5809859/v1), 2025-03-03
Supplement: Supplementary file 1 [file a20c7b155b407346bf91ebf1.docx]

**Sequencing-based Spatial Transcriptomics with scRNA-seq Sensitivity**

Renjie Liao1, Defeng Fu1, Zaoxu Xu1, Han Liang1, Xiaoran Zhou1, Yiling Chen1, Xueqi Liu1, Jiajun Cheng1, Ruidong Guo1, Chen Li1, Huihua Xia1, Gailing Li1, Diewen Feng1, Wei Chen1, Yang Chen1, Longchao Chen1, Yang Zhou1, Qingbin Chen1, Yuanye Bao1, Luyang Zhao1, Erkai Liu1, and Gufeng Wang1*

1.Shenzhen Salus BioMed Inc. Ltd., Shenzhen, Guangdong, China,

***Corresponding Author:** Gufeng Wang, wanggf@salus-bio.com


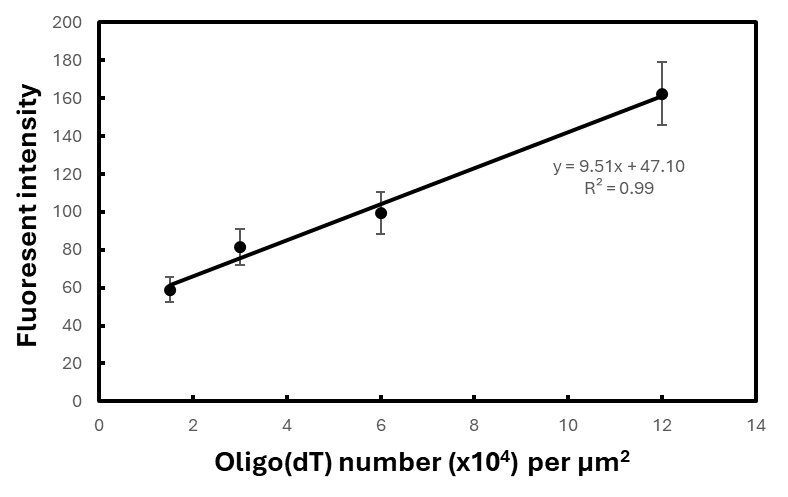


Fig. S1. Standard curve of fluorescent intensity of cy5 vs Oligo(dT) number of chip surface area.


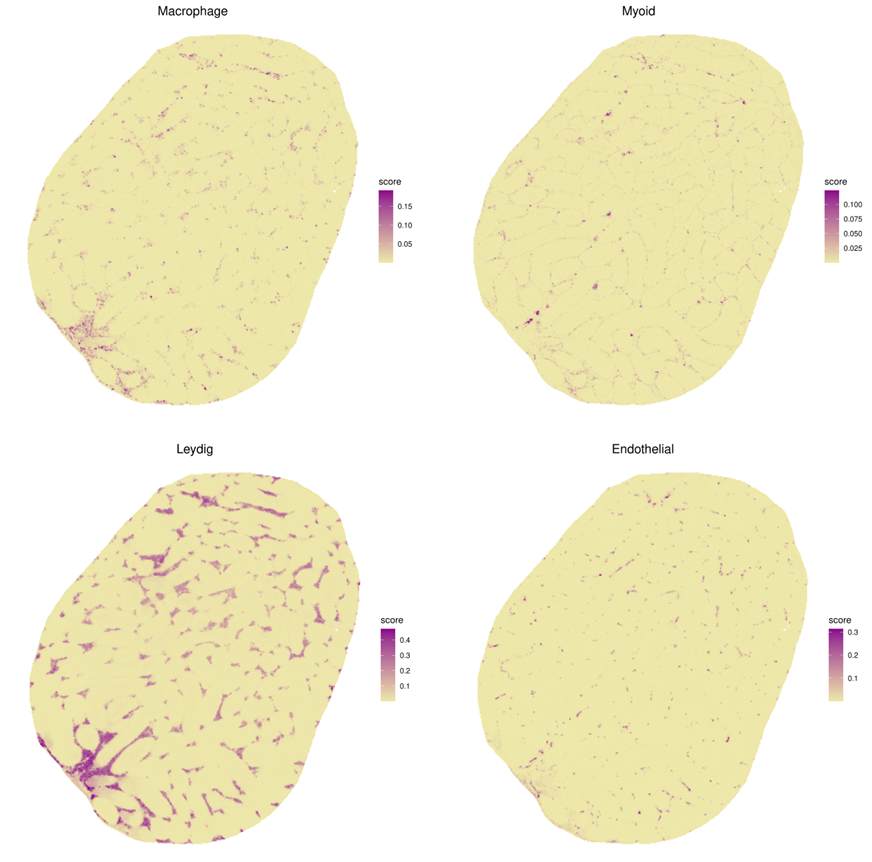


Fig. S2. Spatial distributions of different cell types resolved by RCTD.


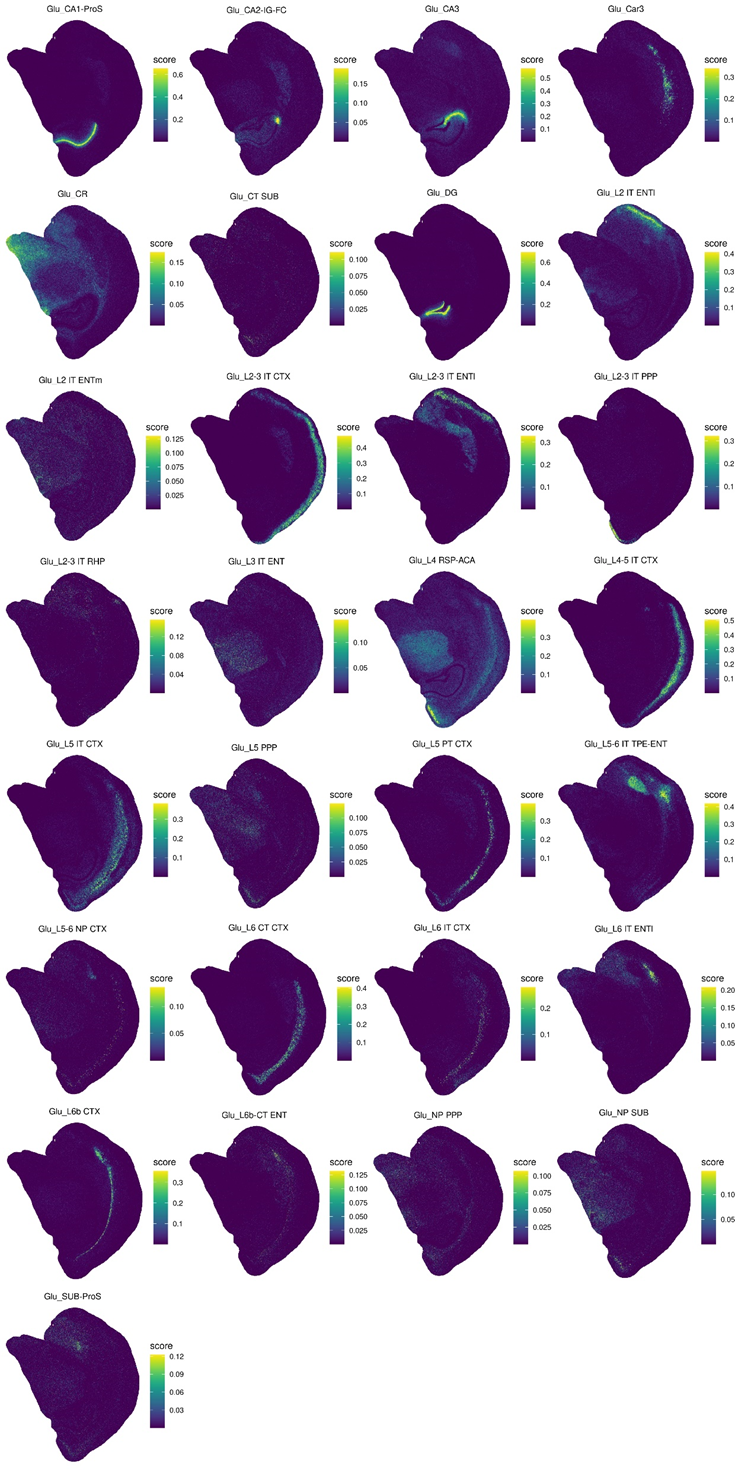


Fig. S3. Spatial distributions of RCTD annotated Glutamatergic neurons.


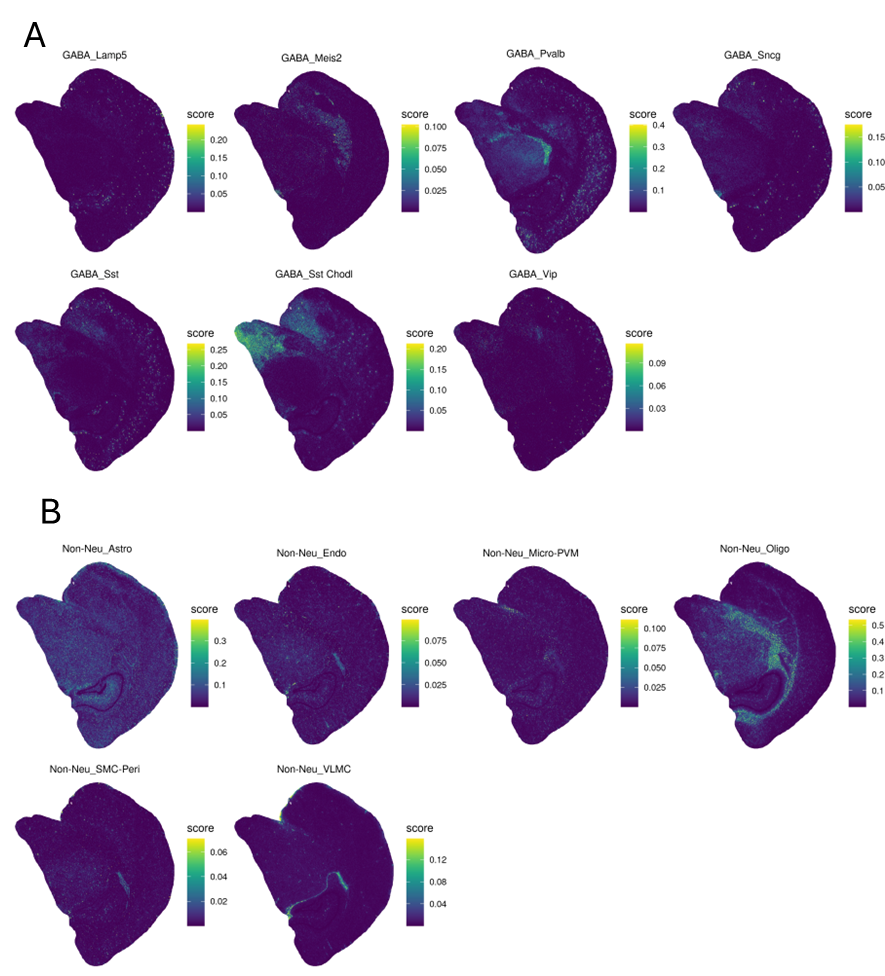


Fig. S4. Spatial distributions of RCTD annotated (A) GABAergic neurons and (B) non-neuron cells.
